# Supplementary material
Source: publisher figshare collection journal article supplement (https://karger.figshare.com/ndownloader/files/17433950)
Supplement: Supplementary file 1 [file 17433950]

**Supplemental Table 1.** Reasons for exclusion from study

| Surviving children born <32 GA and <1500 g between  January 2009 and June 2014 (n) | 269 |
| --- | --- |
| Malformation n (%) | 6 (2.2) |
| BSID-II not available n (%)   - parents´ dissent - families lost for follow up/did not reply - other neurodevelopmental testing - uncooperative child - age at time of examination out of range | 1. (43.9)   27 (22.9)  64 (54.2)  19 (16.1)  7 (5.9)  1(0.8) |
| MRI at TEA (accepted range 37-43 weeks corrected age)  was not available n (%)   - insufficient quality/MRI sequences demanded not available - parents´ dissent - age at time of examination out of range | 16 (5.9)  11 (68.8)  1 (6.25)  4 (25) |

GA, gestational age; BSID-II, Bayley Scales of Infant development II; MRI, magnetic resonance imaging; TEA, term equivalent age
